# Supplementary material
Source: PubMed Central journal article supplement (PMC3245683)
Supplement: NIHMS328799-supplement-1.pdf [file NIHMS328799-supplement-1.pdf]

**Supplemental Table I. *Rattus norvegicus* Primer Sequences**

| Gene     | Primer Sequence (5'-3')   | Accession No.   |
|----------|---------------------------|-----------------|
| Acot2    | (F) CCTACGAAACTGAGGGCTGA  | NM_138907.2     |
|          | (R) GCTCAGCGTAGCATTGTCC   |                 |
| Adss     | (F) CTCCAGGATGGAACACAGA   | NM_001105975.1  |
|          | (R) GCATTGCTGGCAGTCCTTAG  |                 |
| Cacnb2   | (F) CCACAATGAGTGCAGCAAAC  | NM_053851.1     |
|          | (R) CACAGATGGTTGCAATGGAG  |                 |
| Csnk1g1  | (F) AAGTGGAAATGTGGGTCTGGA | NM_022288.1     |
|          | (R) TGAGTCCTTCCTCCCAAG    |                 |
| Dscr1    | (F) GCCCGTTGAAAAAGCAGAAT  | NM_153724       |
|          | (R) GACAGGGGGTTGCTGAAGTT  |                 |
| Dusp1    | (F) GAGGACAACCACAAGGCAGA  | NM_053769.3     |
|          | (R) CGTCCAGCTTCACTCGGTTA  |                 |
| Fam126a  | (F) TGTGCTGTGGTGCTAACTGG  | XM_575330.3     |
|          | (R) CCACACATGCAGCTTTCTCA  |                 |
| Fzd7     | (F) TGA CTGTCTCCGATTTTGC  | XM_237191.5     |
|          | (R) AGCTCCAGTCAACTGATCGTG |                 |
| Gla      | (F) TGTTCATGCAGATGGCAGAG  | NM_001108820.1  |
|          | (R) AGCCTTTGCTGTGGACGTAA  |                 |
| Hsp1a1/b | (F) GCAACGTGCTCATCTTCGAC  | (a) NM_031971.2 |
|          | (R) CGCTTGTTCTGGCTGATGTC  | (b) NM_212540.1 |
| Kif5c    | (F) AGACCAAGTCCACGCTGATG  | NM_001107730.1  |
|          | (R) TCATCCTCAGGCACAGCTTC  |                 |
| Mgat1    | (F) GGGCTTGATTTCGTCCAGAA  | NM_030861.1     |
|          | (R) ACAGGTCCA ACTGGGTGAAG |                 |
| Mobk12a  | (F) TGGACCTGCTTATGGACTGG  | NM_001108734.2  |
|          | (R) GCAGGAAGGTCTTGGGAAAC  |                 |
| Otud1    | (F) GAGAAGTTCAGCCTCTGCAT  | XM_574086.3     |
|          | (R) TGTTTGACCCAGCAAACCAT  |                 |
| Pdlim5   | (F) AGAAGAGGATCCCAGGGTGA  | NM_053326.1     |
|          | (R) GGATTCGGAAGGAACGAGAC  |                 |
| Procr    | (F) ACCTGTCCCAGTTCAACAGC  | NM_001025733.2  |
|          | (R) ACGAAGGCACTTCCATTAC   |                 |
| Rapgef2  | (F) AAGGGAGTTTGGAGCGTCAT  | NM_001107684.1  |
|          | (R) AGAGACTGGCACCGAGTCAA  |                 |
| Rbm14    | (F) CTATGCTGCACAGGCCACTA  | XM_002728823.2  |
|          | (R) GCTGATGACTGAGTGCGGTA  |                 |
| Rras2    | (F) CAGAAACCCTTCCCAACAGA  | NM_001013434.1  |
|          | (R) AAACCAGAAGCCATCCACAG  |                 |
| Vegfc    | (F) ATGTGGGGAAGGAGTTTGGA  | NM_053653.1     |
|          | (R) GTTTGGGGCCTTGAGAGAGA  |                 |
| 18S      | (F) CGGCTACCACATCCAAGGAA  | M11188.1        |
|          | (R) AGCTGGAATTACCGCGGC    |                 |

**Supplemental Table I.** Designed and validated primer sequences for *in vitro* validation.

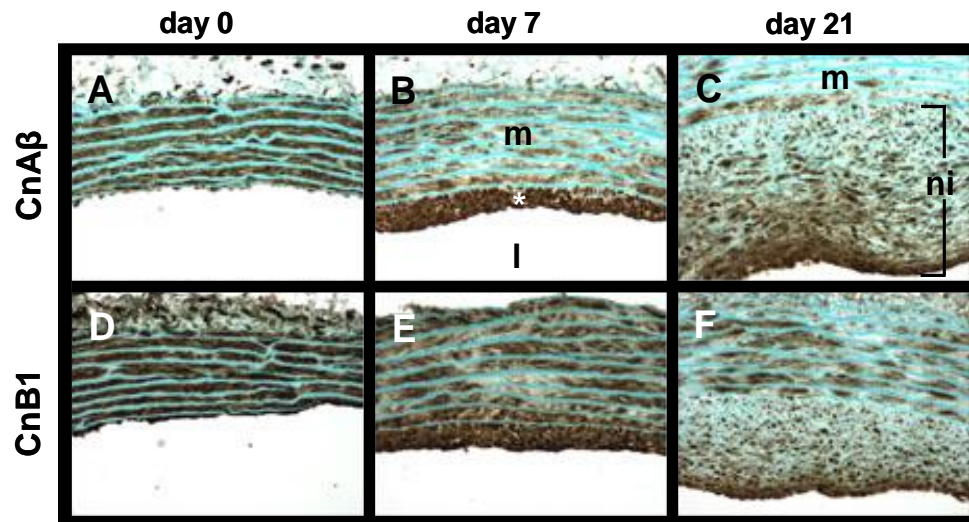

**Supplemental Figure I.** Immunohistochemistry reveals that both CnA $\beta$  and CnB1 are upregulated in the developing neointima (asterisk in panel B) following balloon injury of the rat thoracic aorta. Tunica media (m), neointima (ni), lumen (l).

### A. PROCR-WT-luc

Trace File: pGL3+WildTypeCL2-RVprimer3.ab1

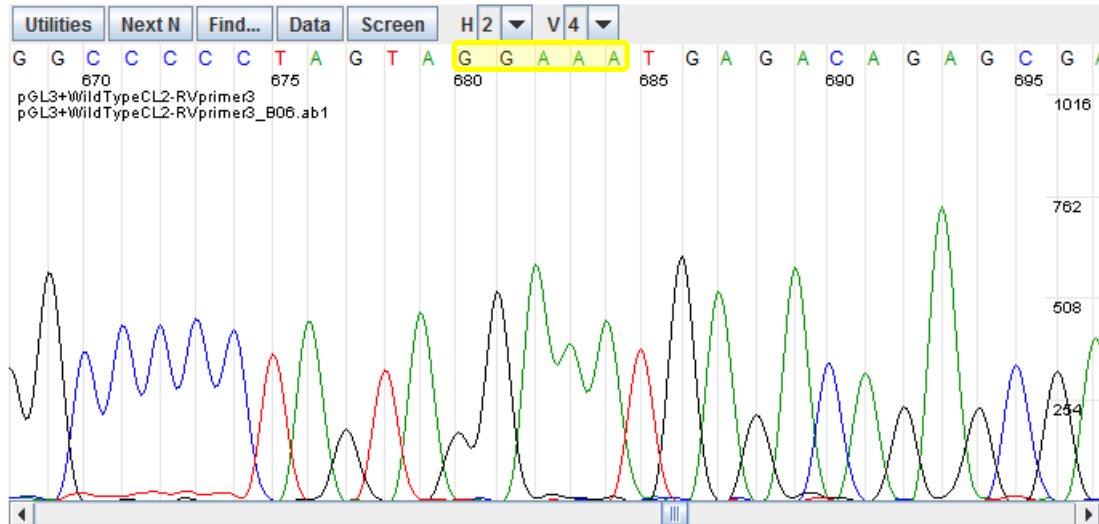

### B. PROCR-MUT-luc

Trace File: pGL3+Mutation6CL2-RVprimer3.ab1

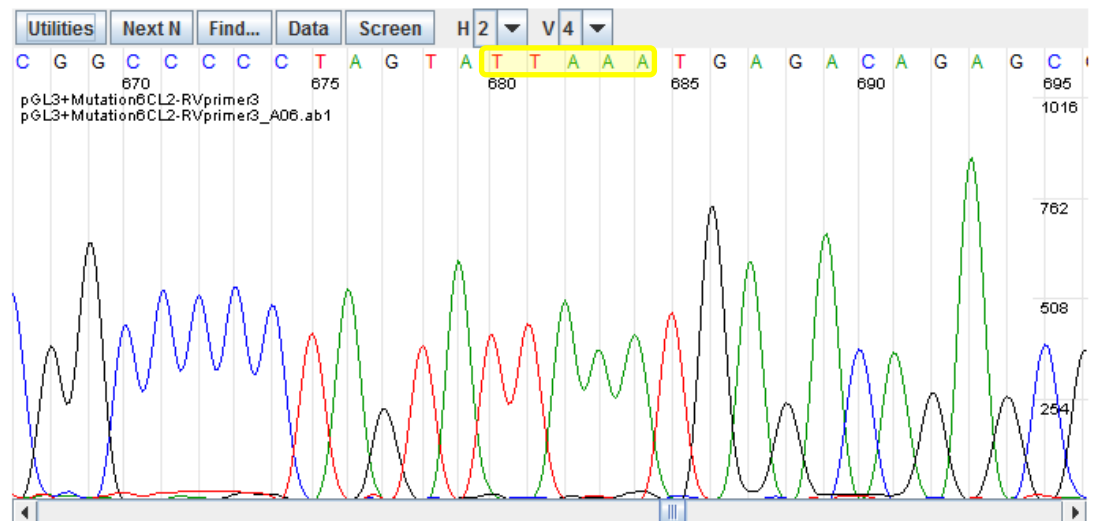

**Supplemental Figure II. PROCR promoter luciferase construct sequence validations.** (A) Trace files from the sequencing facility (GeneWiz) verifies inclusion of the NFAT binding motif in the PROCR-WT-luc plasmid and (B) successful mutation of the NFAT site (GGAAA→TTAAA) in the PROCR-MUT-luc plasmid. (NFAT sites/mutations highlighted in yellow)

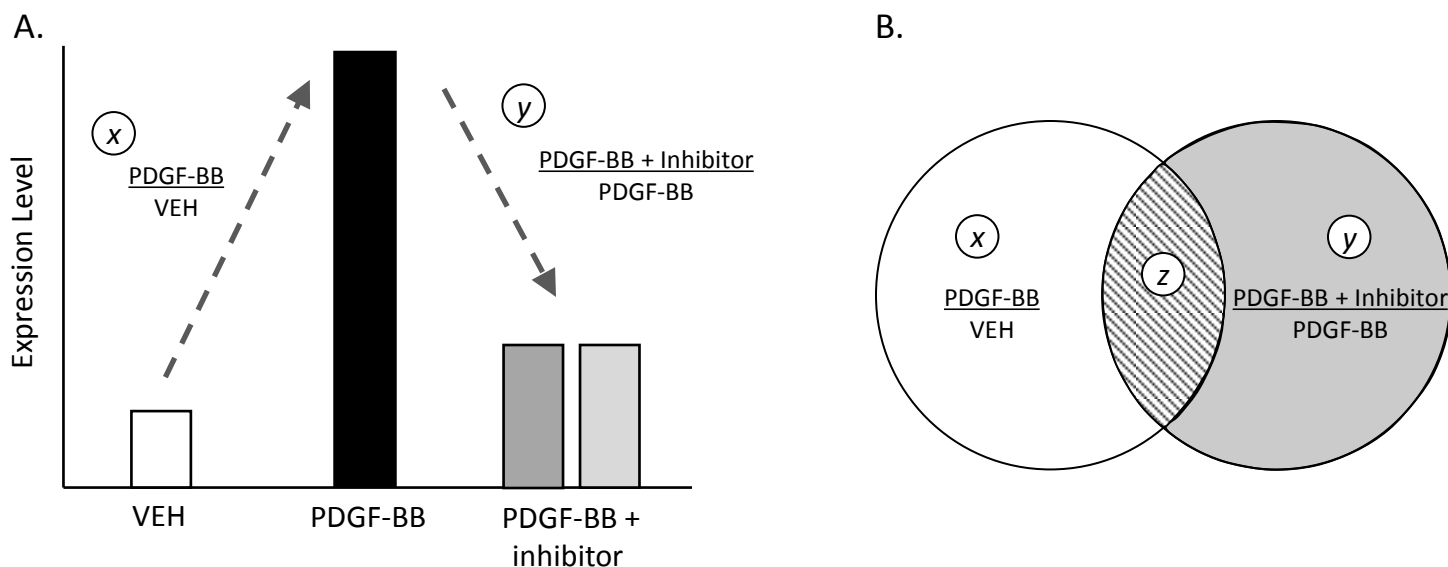

**Supplemental Figure III. Identification of Cn/NFAT target genes.** Differentially upregulated genes as a result of PDGF-BB treatment were first identified by comparing expression values to those in vehicle treated samples (**A**, **x**). Secondly, genes exhibiting a reduction in expression as a result of Cn/NFAT inhibition were identified by comparing CsA or A-285222-treated arrays to the PDGF-BB-treated array (**A**, **y**). Differentially upregulated genes as a result of PDGF-BB treatment (**B**, **x**) were merged with the lists of genes sensitive to Cn/NFAT inhibitors (**B**, **y**) to yield a list of putative PDGF-BB-induced genes dependent on Cn/NFAT activity (**B**, **z**).

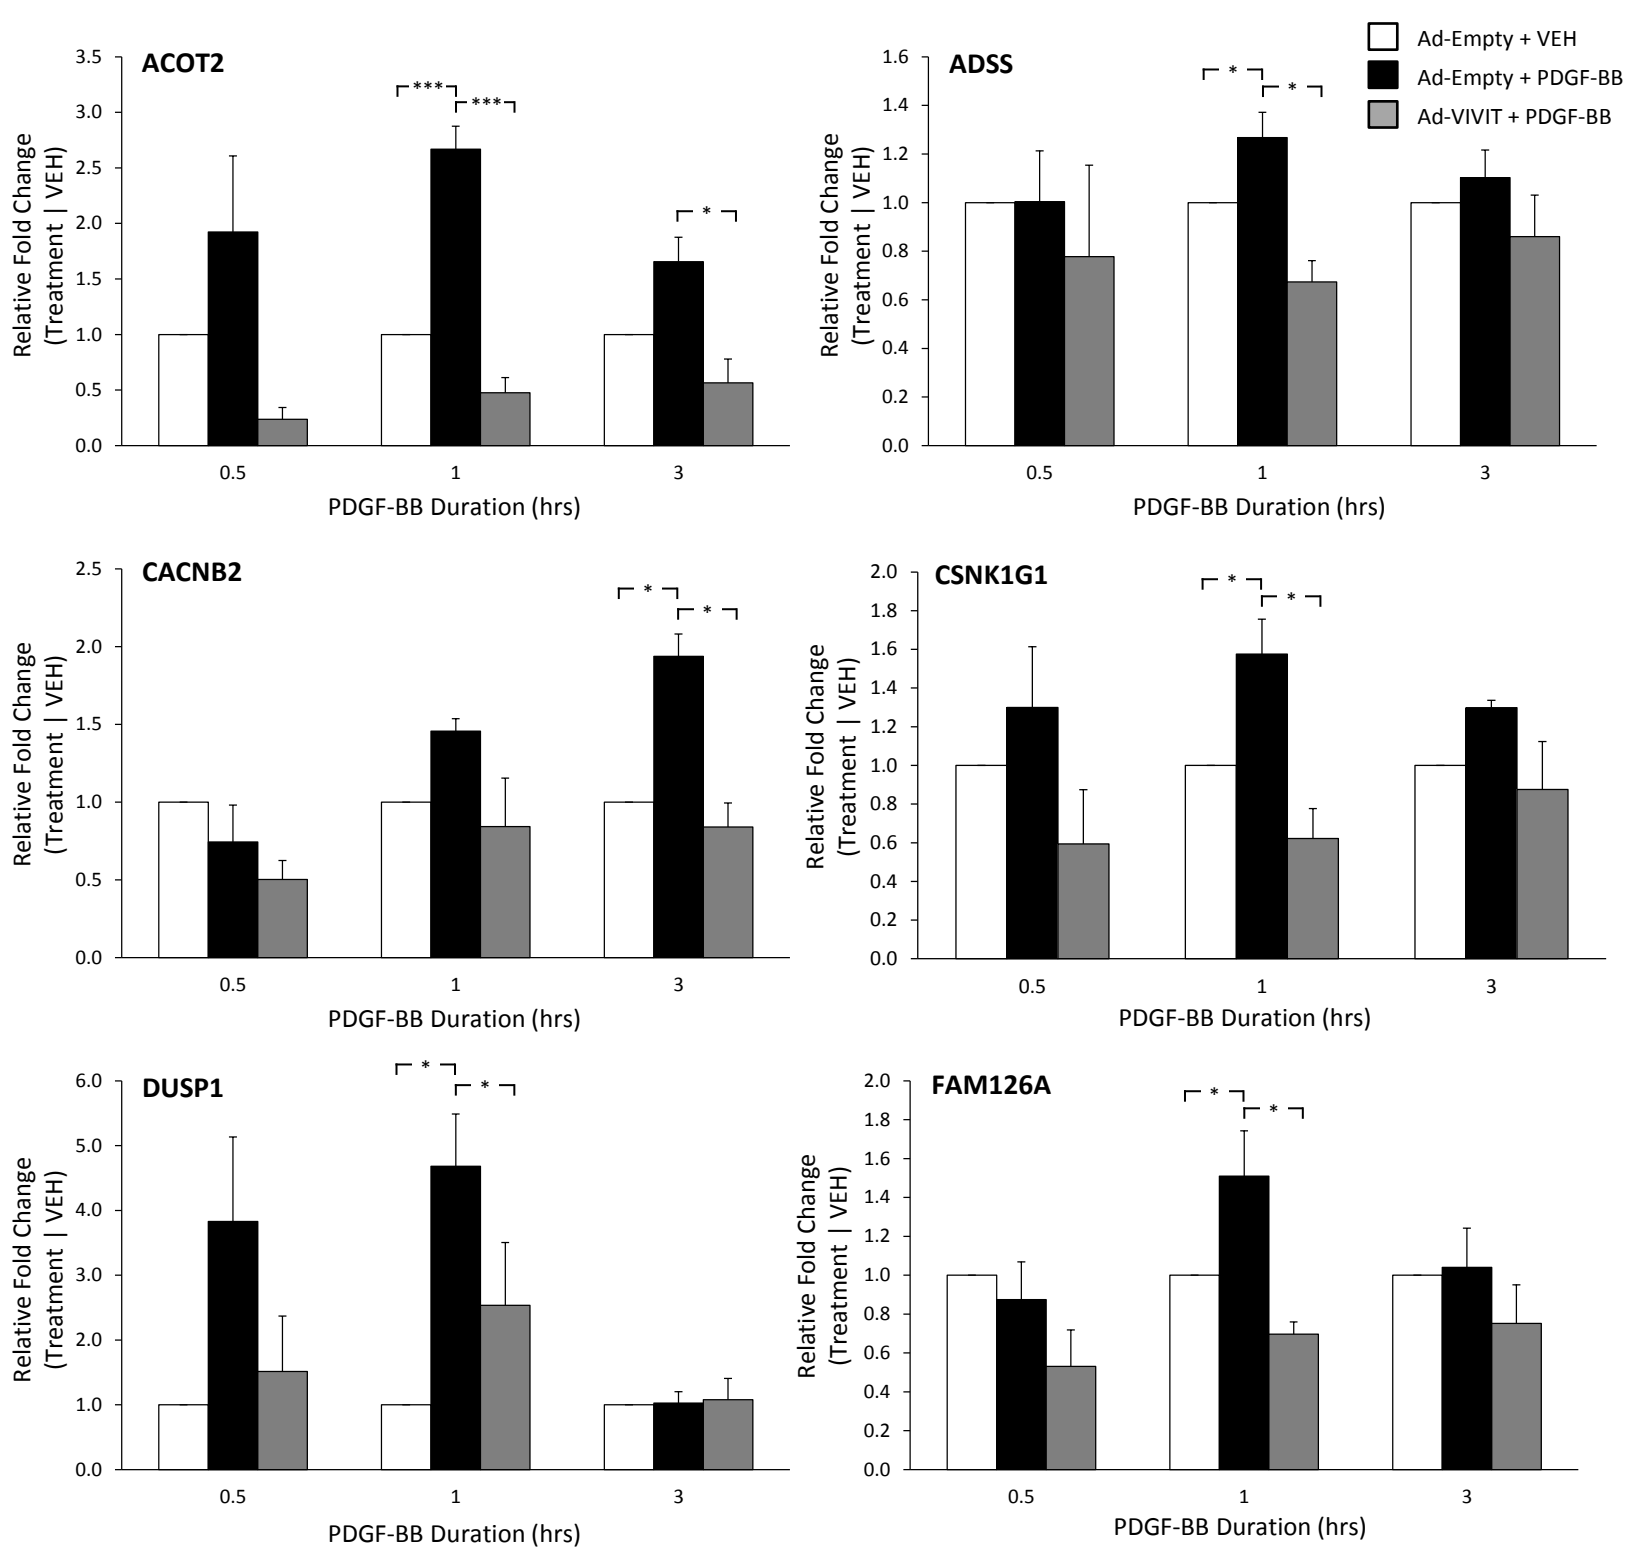

**Supplemental Figure IV.** Functional NFAT dependency was determined for each putative NFAT target gene through use of VIVIT peptide. mRNA changes reflect relative fold change normalized to vehicle conditions for each time point. mRNA changes are relative to 18s rRNA expression. (n≥3, \*p<0.05, \*\*\*p<0.001)

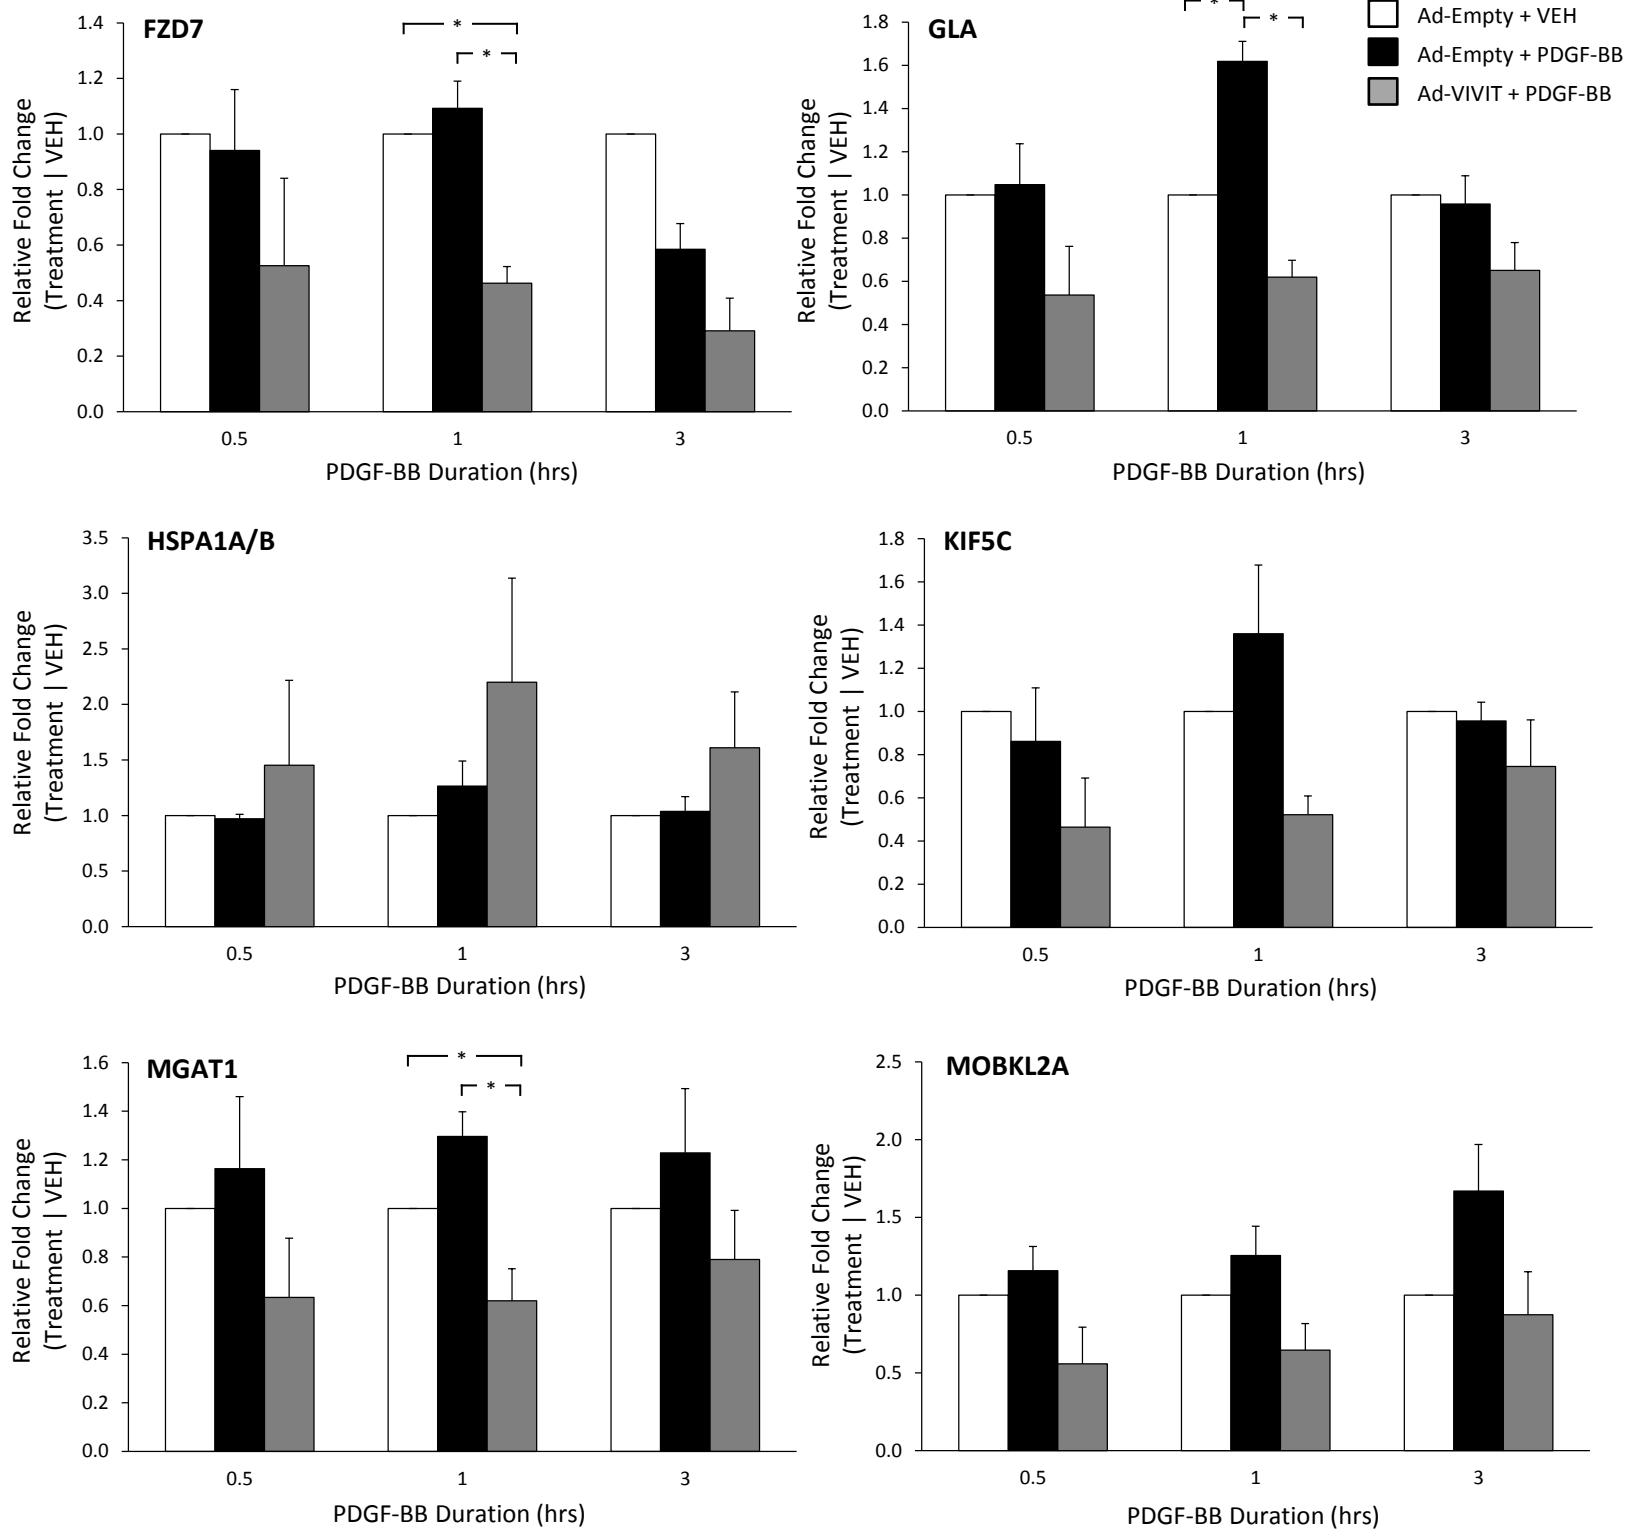

**Supplemental Figure IV.** Functional NFAT dependency was determined for each putative NFAT target gene through use of VIVIT peptide. mRNA changes reflect relative fold change normalized to vehicle conditions for each time point. mRNA changes are relative to 18s rRNA expression. (n≥3, \*p<0.05, \*\*\*p<0.001)

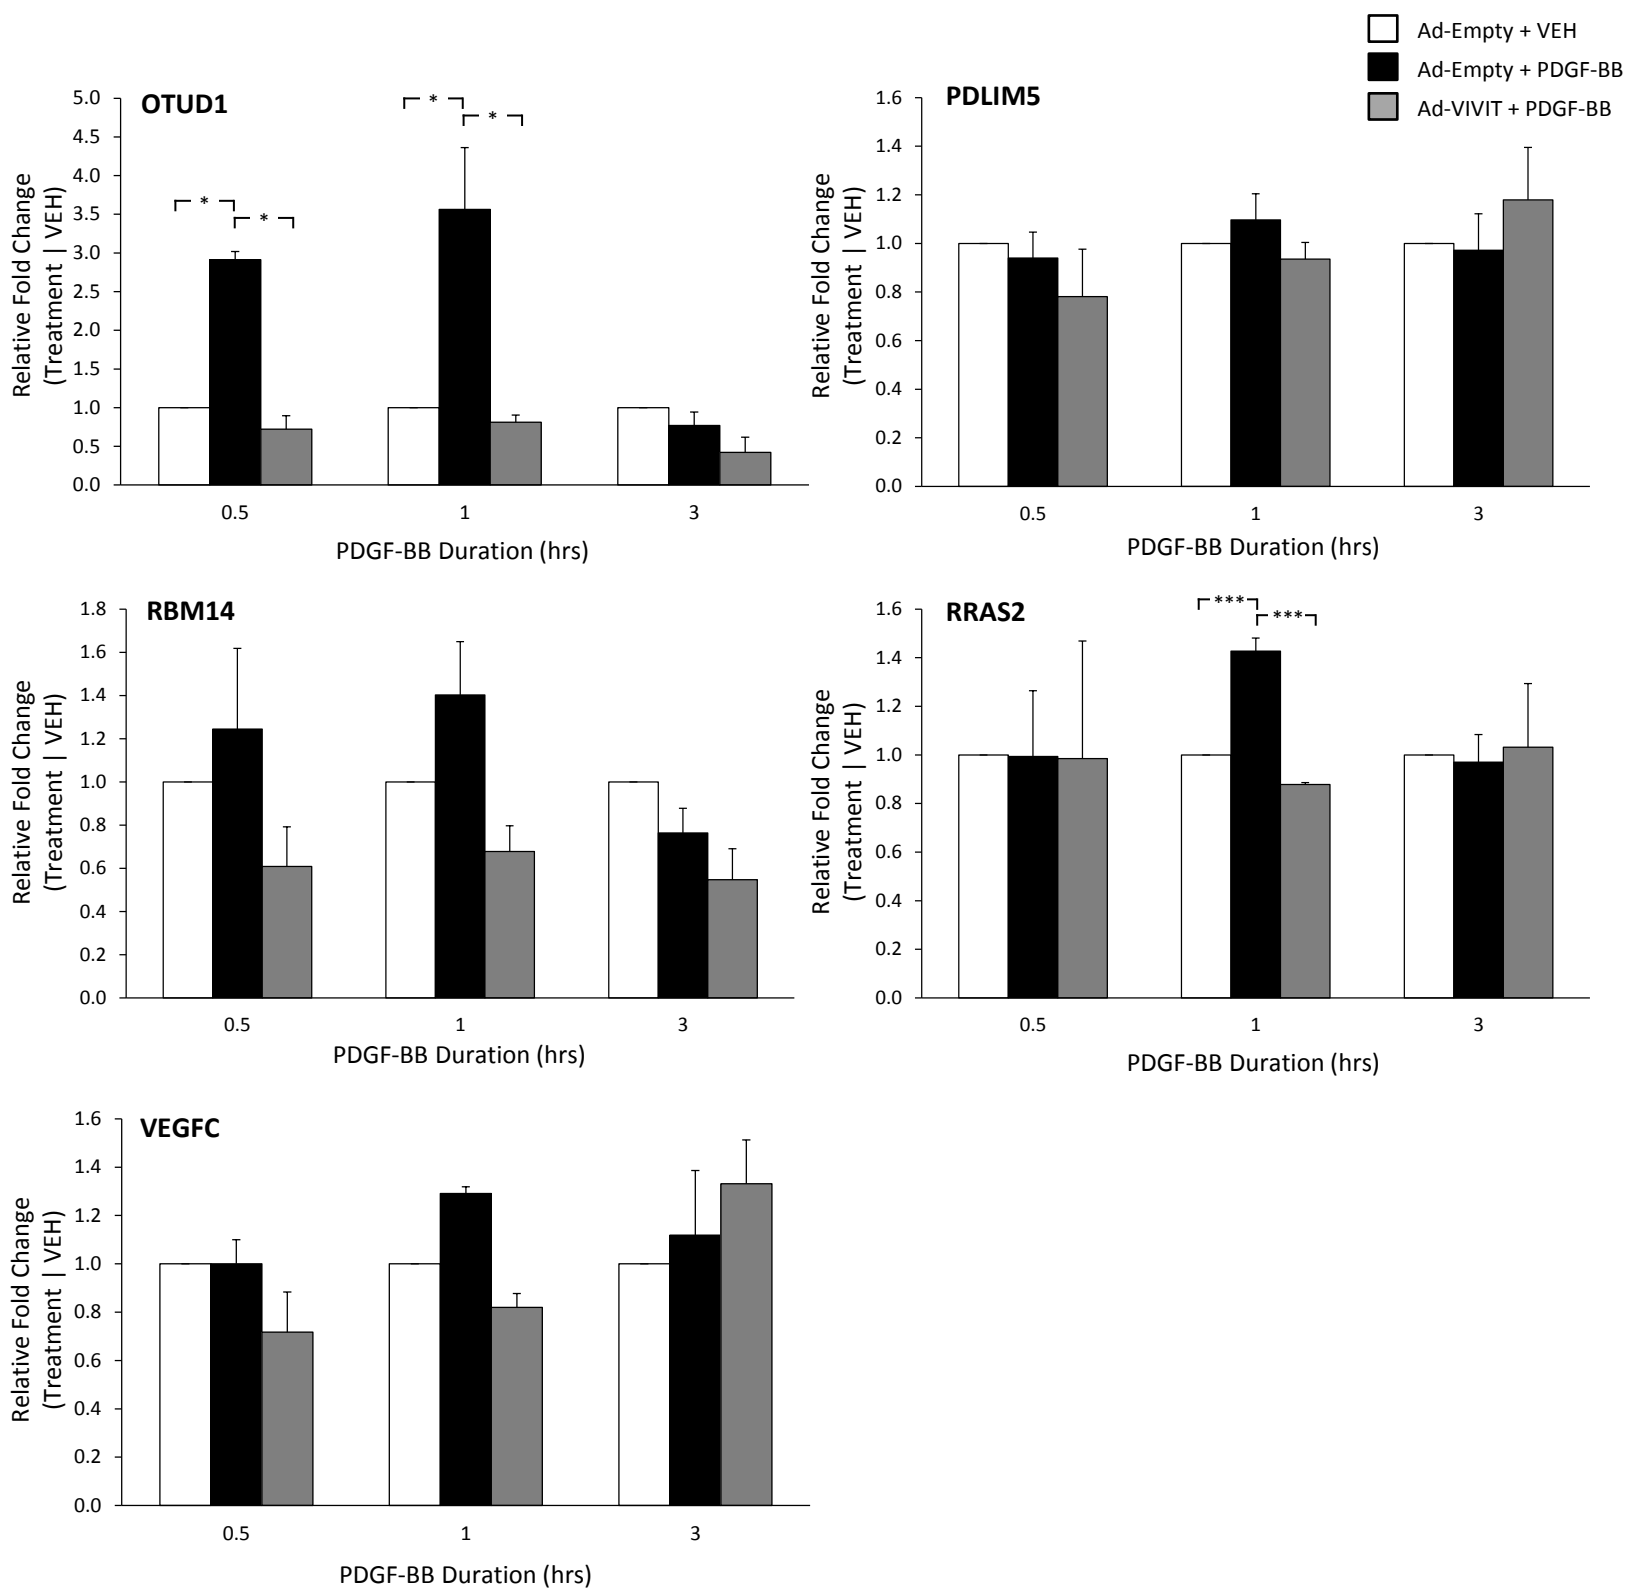

**Supplemental Figure IV.** Functional NFAT dependency was determined for each putative NFAT target gene through use of VIVIT peptide. mRNA changes reflect relative fold change normalized to vehicle conditions for each time point. mRNA changes are relative to 18s rRNA expression. (n≥3, \*p<0.05, \*\*\*p<0.001)

ApoE 12wk HFD

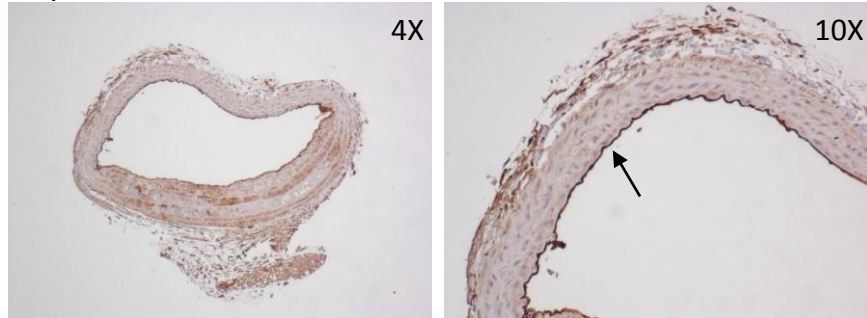

Secondary ONLY

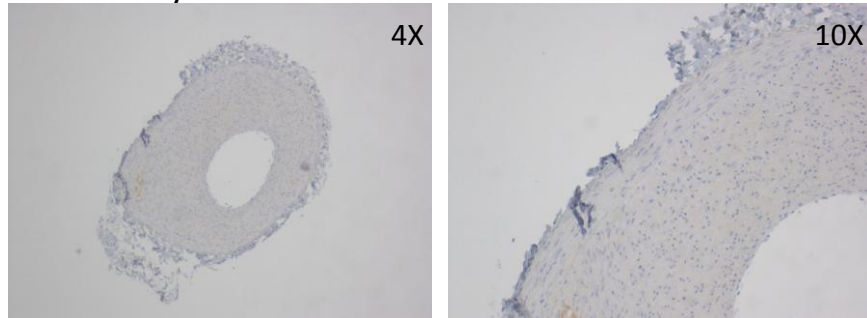

**Supplemental Figure V.** Immunohistological staining of ApoE<sup>-/-</sup> mouse aortas show endothelial PROCR expression (arrow). A secondary only control in balloon-injured rat carotid arteries demonstrate minimal non-specific staining.



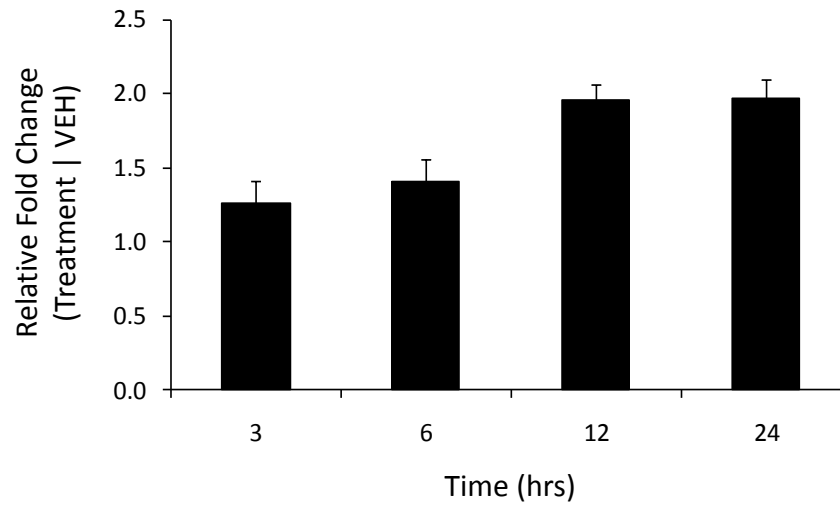

**Supplemental Figure VI.** Thrombin stimulation induces PROCR promoter activity in RASMCs (n=3). Luciferase output normalized to total protein. Thrombin stimulation at each time point normalized to respective vehicle.
